# Supplementary material
Source: MDPI journal article supplement (https://www.mdpi.com/2313-433X/10/2/36)
Supplement: s1 [file s1]

## Supplementary material 1: Luminance profile of OLED screen on Oculus Rift DK2

Top row shows RGB value ((R, G, B) = (x, x, x)) of a uniform screen and the bottom row of corresponding column shows luminance on the screen in  $\text{cd/m}^2$ , measured by a spectroradiometer SR-UL1R (Topcon, Japan). A program written in Unity was used to present an uniform rectangular tile, covering the entire OLED screen, for the luminance calibration.

| RGB val.                    | 0                     | 1      | 2      | 3      | 4     | 8     | 16    |
|-----------------------------|-----------------------|--------|--------|--------|-------|-------|-------|
| Lum.<br>( $\text{cd/m}^2$ ) | $1.46 \times 10^{-5}$ | 0.0120 | 0.0378 | 0.0751 | 0.114 | 0.281 | 0.625 |
|                             |                       | 24     | 32     | 40     | 48    | 56    | 64    |
|                             |                       | 1.11   | 1.71   | 2.43   | 3.28  | 4.31  | 5.49  |
|                             |                       | 72     | 80     | 88     | 96    | 104   | 112   |
|                             |                       | 7.00   | 8.38   | 10.07  | 11.71 | 13.79 | 15.98 |
|                             |                       | 120    | 128    | 136    | 144   | 152   | 160   |
|                             |                       | 17.4   | 20.9   | 22.4   | 26.1  | 28.5  | 30.5  |
|                             |                       | 168    | 176    | 184    | 192   | 200   | 208   |
|                             |                       | 35.8   | 39.8   | 42.9   | 46.0  | 51.0  | 60.1  |
|                             |                       | 216    | 224    | 232    | 240   | 248   | 255   |
|                             |                       | 61.3   | 62.4   | 70.6   | 71.7  | 76.5  | 90.4  |
